# Supplementary figures and images for: Induction avelumab followed by chemoimmunotherapy and maintenance versus chemotherapy alone as first-line therapy in cis-ineligible metastatic urothelial carcinoma (INDUCOMAIN): a randomized phase II study
Source: PubMed Central journal article supplement — ESMO Open. 2024 Aug 29;9(9):103690. doi: 10.1016/j.esmoop.2024.103690 (PMC11402049; doi:10.1016/j.esmoop.2024.103690), 2024-08-29

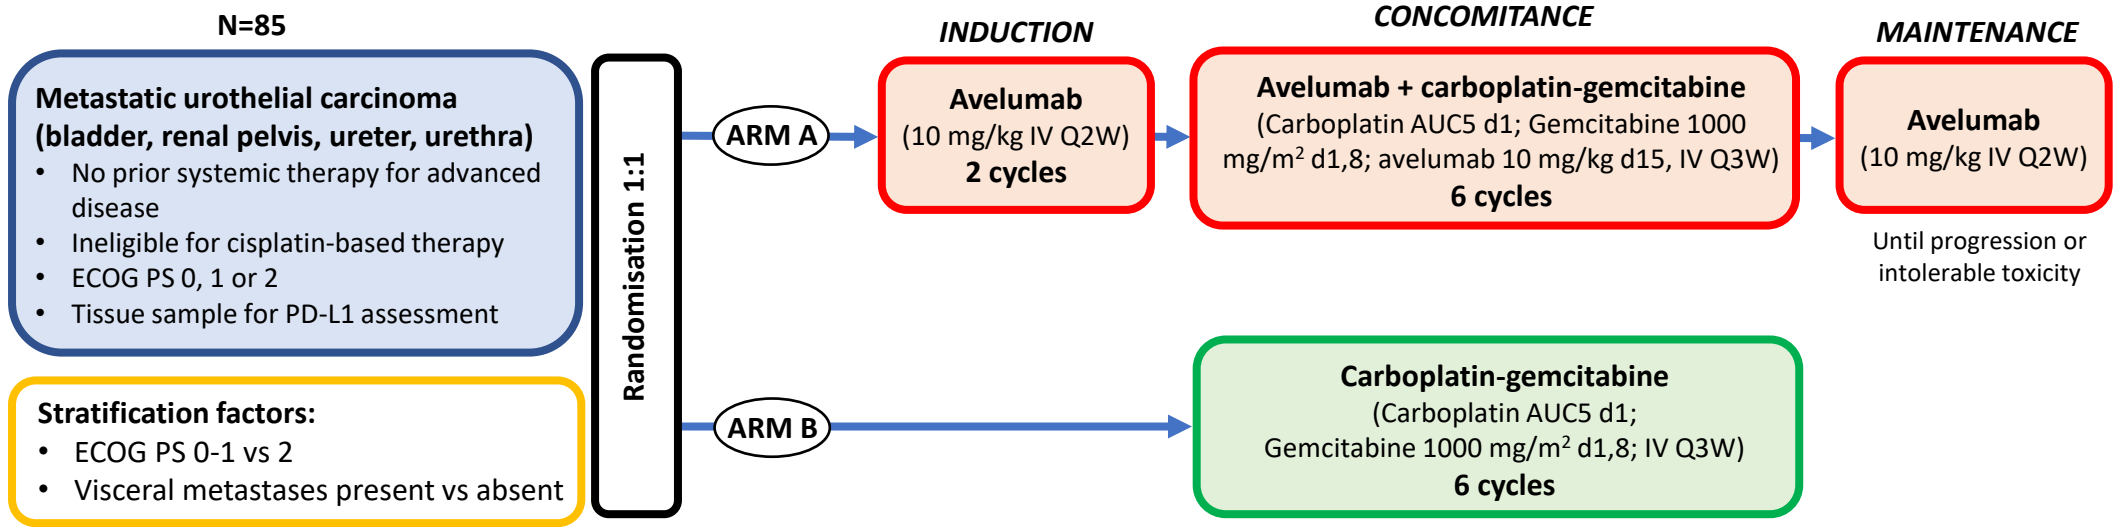

Supplement: mmc1.pdf [file mmc1.pdf]

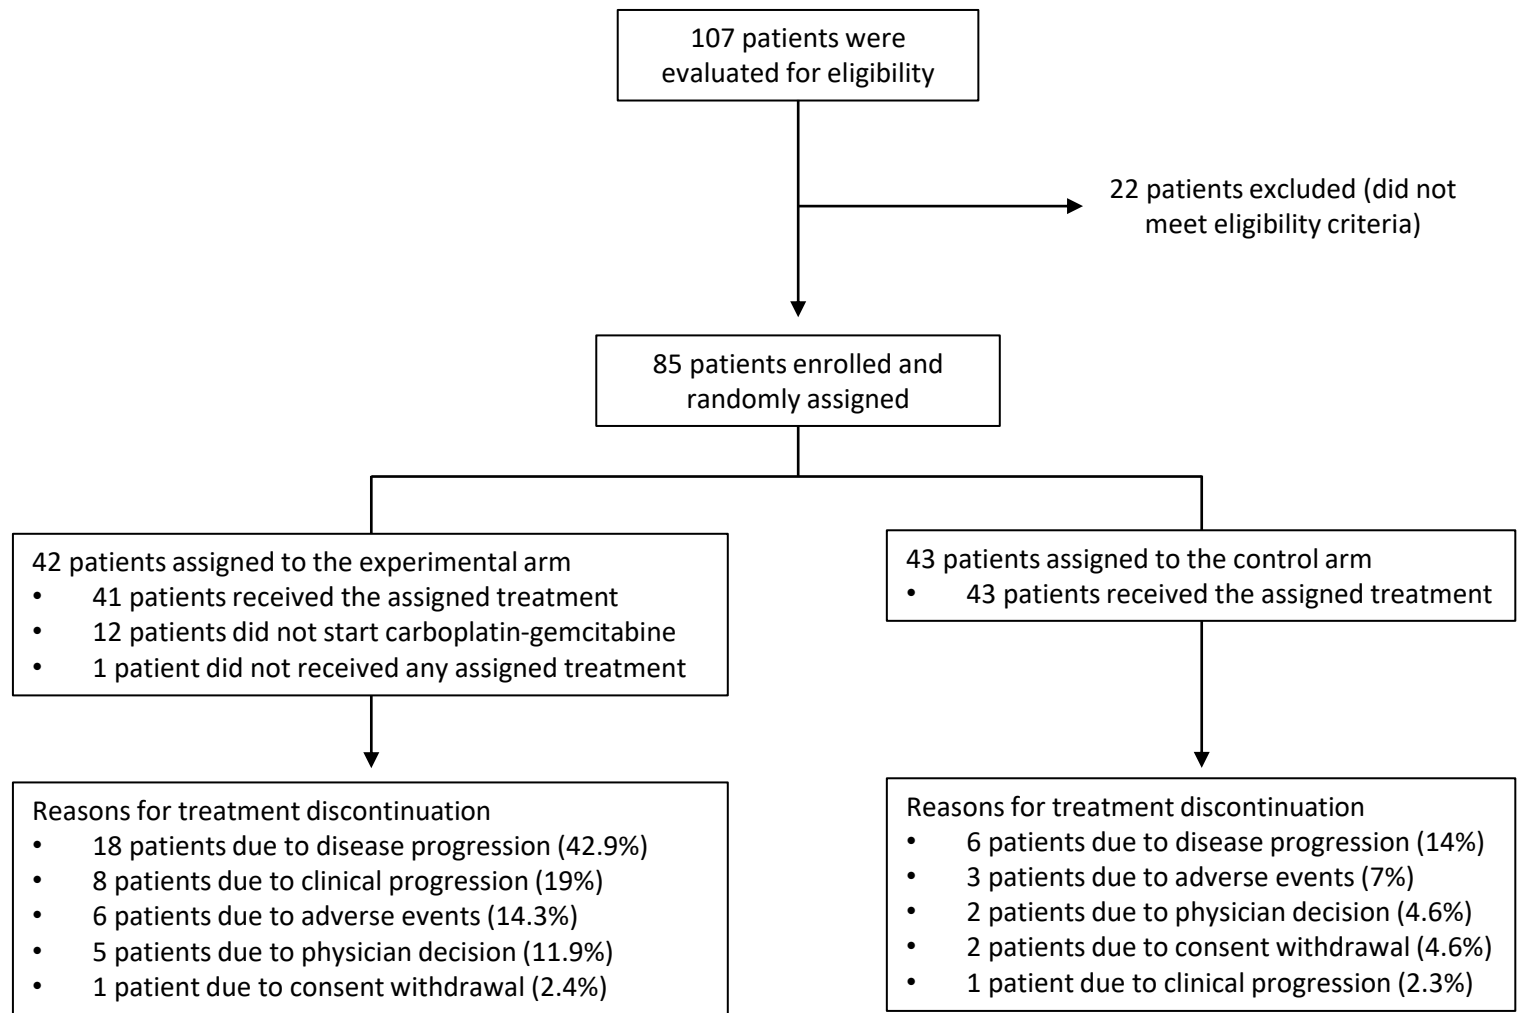

Supplement: mmc2.pdf [file mmc2.pdf]
